# Supplementary material for: Comparison of the microbiome, metabolome, and lipidome of obese and non-obese horses
Source: PubMed Central journal article supplement (PMC6478336; doi:10.1371/journal.pone.0215918), 2019-04-23
Supplement: pone.0215918.s001.pdf [file pone.0215918.s001.pdf]

| Horse | Group     | Age<br>(years) | Breed         | Sex     | Body<br>Condition<br>Score | Farm |
|-------|-----------|----------------|---------------|---------|----------------------------|------|
| 1     | Obese     | 7              | Quarter Horse | Gelding | 8                          | 1    |
| 2     | Non-Obese | 24             | Quarter Horse | Gelding | 4                          | 1    |
| 3     | Obese     | 7              | Quarter Horse | Gelding | 7                          | 1    |
| 4     | Non-Obese | 21             | Thoroughbred  | Mare    | 5                          | 1    |
| 5     | Obese     | 14             | Warmblood     | Gelding | 8                          | 1    |
| 6     | Non-Obese | 16             | Quarter Horse | Gelding | 5                          | 1    |
| 7     | Obese     | 16             | Quarter Horse | Gelding | 7                          | 2    |
| 8     | Obese     | 10             | Quarter Horse | Mare    | 8                          | 2    |
| 9     | Obese     | 18             | Draft         | Gelding | 8                          | 2    |
| 10    | Obese     | 13             | Draft         | Gelding | 8                          | 2    |
| 11    | Obese     | 9              | Quarter Horse | Gelding | 8                          | 2    |
| 12    | Obese     | 16             | Draft         | Gelding | 7                          | 2    |
| 13    | Non-Obese | 13             | Quarter Horse | Gelding | 5                          | 2    |
| 14    | Non-Obese | 14             | Quarter Horse | Gelding | 5                          | 2    |
| 15    | Non-Obese | 6              | Quarter Horse | Gelding | 5                          | 2    |
| 16    | Non-Obese | 17             | Draft         | Mare    | 4                          | 2    |
| 17    | Non-Obese | 21             | Quarter Horse | Gelding | 5                          | 2    |
| 18    | Non-Obese | 6              | Quarter Horse | Gelding | 5                          | 2    |
| 19    | Non-Obese | 14             | Quarter Horse | Gelding | 3                          | 3    |
| 20    | Non-Obese | 18             | Quarter Horse | Gelding | 4                          | 3    |
| 21    | Non-Obese | 20             | Quarter Horse | Gelding | 5                          | 3    |
| 22    | Obese     | 18             | Quarter Horse | Gelding | 7                          | 3    |
| 23    | Obese     | 9              | Quarter Horse | Gelding | 8                          | 3    |
| 24    | Obese     | 9              | Quarter Horse | Mare    | 7                          | 3    |
| 25    | Obese     | 14             | Quarter Horse | Gelding | 7                          | 4    |
| 26    | Non-Obese | 5              | Quarter Horse | Mare    | 5                          | 4    |
| 27    | Obese     | 17             | Quarter Horse | Gelding | 7                          | 4    |
| 28    | Non-Obese | 14             | Appaloosa     | Gelding | 5                          | 4    |
| 29    | Obese     | 9              | Quarter Horse | Gelding | 8                          | 5    |
| 30    | Non-Obese | 13             | Quarter Horse | Gelding | 5                          | 5    |
| 31    | Obese     | 14             | Quarter Horse | Gelding | 8                          | 5    |
| 32    | Non-Obese | 20             | Quarter Horse | Gelding | 5                          | 5    |
| 33    | Obese     | 18             | Quarter Horse | Gelding | 8                          | 5    |
| 34    | Non-Obese | 6              | Thoroughbred  | Gelding | 4                          | 5    |
| 35    | Obese     | 16             | Warmblood     | Mare    | 7                          | 6    |
| 36    | Obese     | 20             | Warmblood     | Mare    | 8                          | 6    |
| 37    | Non-Obese | 20             | Warmblood     | Mare    | 5                          | 6    |
| 38    | Non-Obese | 5              | Thoroughbred  | Gelding | 5                          | 6    |
| 39    | Obese     | 15             | Arabian       | Mare    | 8                          | 7    |
| 40    | Non-Obese | 8              | Warmblood     | Gelding | 5                          | 7    |
