# Supplementary material for: Comparison of the microbiome, metabolome, and lipidome of obese and non-obese horses
Source: PubMed Central journal article supplement (PMC6478336; doi:10.1371/journal.pone.0215918), 2019-04-23
Supplement: pone.0215918.s002.pdf [file pone.0215918.s002.pdf]

| <b>Kingdom</b> | <b>Phylum</b>   | <b>Class</b>      | <b>Order</b>         | <b>Family</b>         | <b>Genus</b>         | <b>Species</b> | <b>log2 fold change</b> | <b>FDR P-value</b> |
|----------------|-----------------|-------------------|----------------------|-----------------------|----------------------|----------------|-------------------------|--------------------|
| k_Bacteria     | p_Firmicutes    | c_Clostridia      | o_Clostridiales      | f_Ruminococcaceae     | g_Ruminococcus       | s_             | -3.13849                | 0.0048             |
| k_Bacteria     | NA              | NA                | NA                   | NA                    | NA                   | NA             | -3.51583                | 0.0049             |
| k_Bacteria     | NA              | NA                | NA                   | NA                    | NA                   | NA             | -3.07380                | 0.0087             |
| k_Archaea      | p_Euryarchaeota | c_Methanobacteria | o_Methanobacteriales | f_Methanobacteriaceae | g_Methanobrevibacter | s_             | -2.93878                | 0.0221             |
| k_Bacteria     | NA              | NA                | NA                   | NA                    | NA                   | NA             | -2.81307                | 0.0221             |
| k_Bacteria     | p_Firmicutes    | c_Clostridia      | o_Clostridiales      | f_Lachnospiraceae     | NA                   | NA             | -2.29729                | 0.0221             |
| k_Bacteria     | NA              | NA                | NA                   | NA                    | NA                   | NA             | -1.44473                | 0.0404             |
| k_Bacteria     | p_Bacteroidetes | NA                | NA                   | NA                    | NA                   | NA             | -2.30031                | 0.0481             |
| k_Bacteria     | p_Bacteroidetes | NA                | NA                   | NA                    | NA                   | NA             | -1.92803                | 0.0481             |
